# Supplementary material for: Luminescent metal–organic gels with tetraphenylethylene moieties: porosity and aggregation-induced emission
Source: Royal Society of Chemistry journal article supplement (doi:10.1039/c3ra40363g), 2013-01-01
Supplement: c3ra40363g.pdf [file c3ra40363g.pdf]

## Electronic Supplementary Information:

Luminescent metal-organic gels with tetraphenylethylene moieties: porosity and aggregation-induced emission

Hongmiao Li, Yixuan Zhu, Jianyong Zhang,\* Zhenguo Chi, Liuping Chen and Cheng-Yong Su\*

*KLGHEI of Environment and Energy Chemistry, School of Chemistry and Chemical Engineering, Sun Yat-Sen University, Guangzhou 510275, China. E-mail: zhjyong@mail.sysu.edu.cn*

## Experimental Section

### Materials and methods

All chemical reagents were commercially available and used as received unless otherwise stated. Tetrakis(4-carboxyphenyl)ethylene (H<sub>4</sub>TCPE) was synthesized according to the reported procedures.<sup>1</sup> Scanning electron micrographs were recorded on a FEI Quanta 400F thermal field emission environmental scanning electron microscope. Samples were prepared by dispersing in ethanol upon sonication and placing on top of aluminum foil. Transmission electron micrographs were conducted on a JEOL JEM-2010HR microscope. Samples for TEM observations were prepared by dispersing the gels in ethanol by sonication and then immersing a carbon-coated copper grid. IR spectra were recorded on a Nicolet/Nexus-670 FT-IR spectrometer with KBr pellets in the range 4000-450 cm<sup>-1</sup>. X-ray Photoelectron spectra were recorded on a Thermo Fisher Scientific ESCALAB 250 spectrometer with X-ray monochromatised Al K $\alpha$  radiation. TG analysis was performed on a NETZSCH TG 209 thermal analyzer at a heating rate of 10°C min<sup>-1</sup> in nitrogen at a flow rate of 20 mL min<sup>-1</sup>. N<sub>2</sub> adsorption-desorption isotherms were measured at 77 K on a Quantachrome Autosorb-iQ analyzer. The aerogels were degassed at 80°C for 16 h to remove solvent molecules prior to analysis. UV-vis absorption spectra were recorded using a Shimadzu UV-2400 spectrophotometer. The photoluminescence spectra, life times and quantum yields were measured on EDINBURGH FLSP920 combined fluorescence life time and steady states spectrometer. The quantum yields were determined with quinine sulfate as standard reference, and calculated by using  $\Phi_x =$

$\Phi_{\text{std}}(F_s/A_s)/(F_{\text{std}}/A_{\text{std}})$ , where  $A$  is the absorbancy and  $F$  is the area of the emission peak with the subscript  $x$  and  $\text{std}$  representing the gel and the standard, respectively.

### Preparation of gels

Typical procedure: A suspension of  $\text{H}_4\text{TCPE}$  (7.6 mg, 0.015 mmol) in EtOH (0.5 mL) was mixed with a solution of  $\text{Al}(\text{NO}_3)_3 \cdot 9\text{H}_2\text{O}$  (7.5 mg, 0.02 mmol) in EtOH (0.5 mL) to give a clear solution upon sonication. The mixture was allowed to stand in a closed vial at  $80^\circ\text{C}$ . A transparent Al-TCPE gel was obtained after 0.5 h.

Microanalysis of Al-TCPE aerogel: Found (calculated) for  $\text{C}_{100}\text{H}_{92}\text{N}_2\text{O}_{53}\text{Al}_4$  ( $\text{Al}_4(\text{TCPE})_3 \cdot \text{EtOH} \cdot 22\text{H}_2\text{O} \cdot 2\text{HNO}_3$ ) C 50.46(50.46) H 4.35(4.60) N 1.15(1.27)%;

Microanalysis of Cr-TCPE aerogel: Found (calculated) for  $\text{C}_{120}\text{H}_{96}\text{N}_2\text{O}_{59}\text{Cr}_4$  ( $\text{Cr}_4(\text{TCPE})_3 \cdot 3\text{EtOH} \cdot 26\text{H}_2\text{O} \cdot 2\text{HNO}_3$ ) C 46.64(46.99) H 5.01(4.93) N 1.09(1.14)%;

Microanalysis of Fe-TCPE aerogel: Found (calculated) for  $\text{C}_{96}\text{H}_{103.5}\text{N}_{1.5}\text{O}_{49.5}\text{Fe}_4$  ( $\text{Fe}_4(\text{TCPE})_3 \cdot 3\text{EtOH} \cdot 18\text{H}_2\text{O} \cdot 1.5\text{HNO}_3$ ) C 50.14(50.27) H 4.38(4.55) N 0.81(0.92)%.

**Detection of PA.** The above Al-TCPE gel was dispersed in water in aid of sonication to give a 10 mL gel ( $1.5 \text{ mmol L}^{-1}$  based on TCPE). Fluorescence quenching titrations were carried out by gradually adding aqueous solution of PA ( $1.0 \times 10^{-2} \text{ mol L}^{-1}$ ) into 3.00 mL of the gel dispersed medium in an incremental fashion. Their corresponding fluorescence emission spectra were recorded excited at 394 nm.

### Fluorescence quenching titrations

The Al-TCPE gel was dispersed in EtOH ( $1.5 \times 10^{-3} \text{ mol/L}$  based on TCPE). Various aromatic compounds, benzoic acid, nitrobenzene, 2,4-dinitro-chlorobenzene, chlorobenzene, bromobenzene, 3,5-dinitro-benzoic acid and nitrotoluene, were used as quenchers to check the selectivity of the Al-TCPE gel. All titrations were carried out by gradually adding quenchers ( $1.0 \times 10^{-2} \text{ mol/L}$  in EtOH, 100  $\mu\text{L}$ ) into 3.00 mL of the gel dispersed medium in an incremental fashion. Their corresponding fluorescence emission spectra were recorded at RT. Relative fluorescence intensities were

measured for dispersed gel in ethanol and various quenchers in ethanol. The fluorescence efficiency was calculated by  $[(I_0-I)/I_0] \times 100\%$ , where  $I_0$  is the initial fluorescence intensity.

### **Paper sensor for visual detection of PA**

The above Al-TCPE gel was dispersed in EtOH upon sonication to give a 10 mL dispersed medium ( $1.5 \text{ mmol L}^{-1}$  based on TCPE). A piece of filter paper (~1 cm in size) was immersed in the dispersion for 30 min, and then removed from the mixture and dried at  $50^\circ\text{C}$  for 10 min. The handwriting with different concentration of PA aqueous solution as ink was put on the filter paper. The paper with handwriting was imaged under 365-nm radiation with a UV lamp.

- 1) N. B. Shustova, B. D. McCarthy and M. Dincă, *J. Am. Chem. Soc.*, 2011, **133**, 20126–20129.

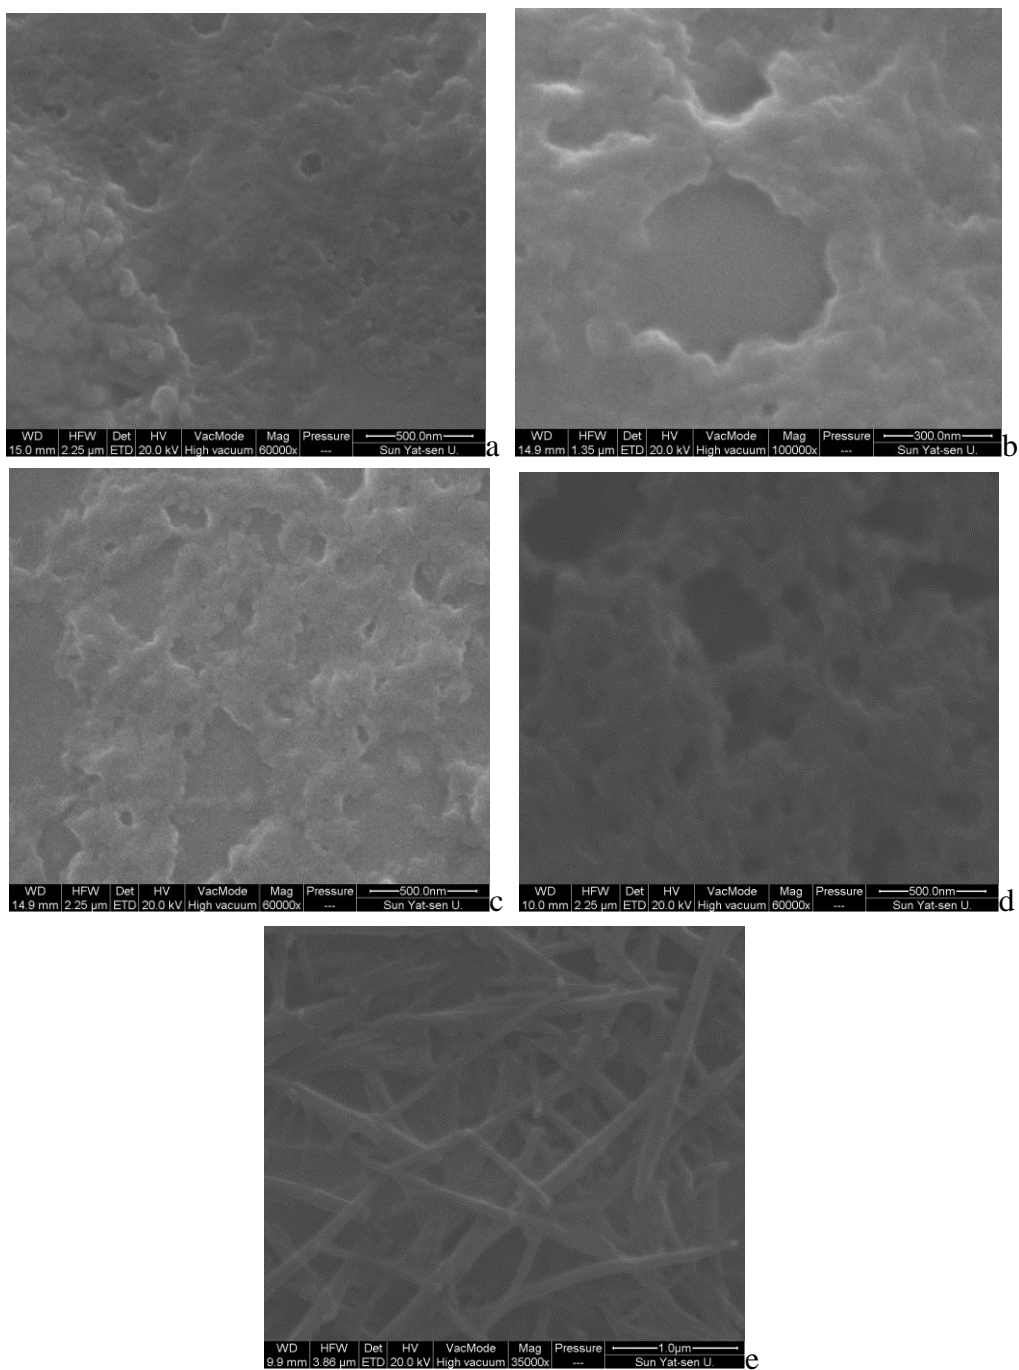

**Fig. S1** SEM images of gels a) Al-TCPE, b) Cr-TCPE, c) Fe-TCPE, d) Ga-TCPE and e) In-TCPE.

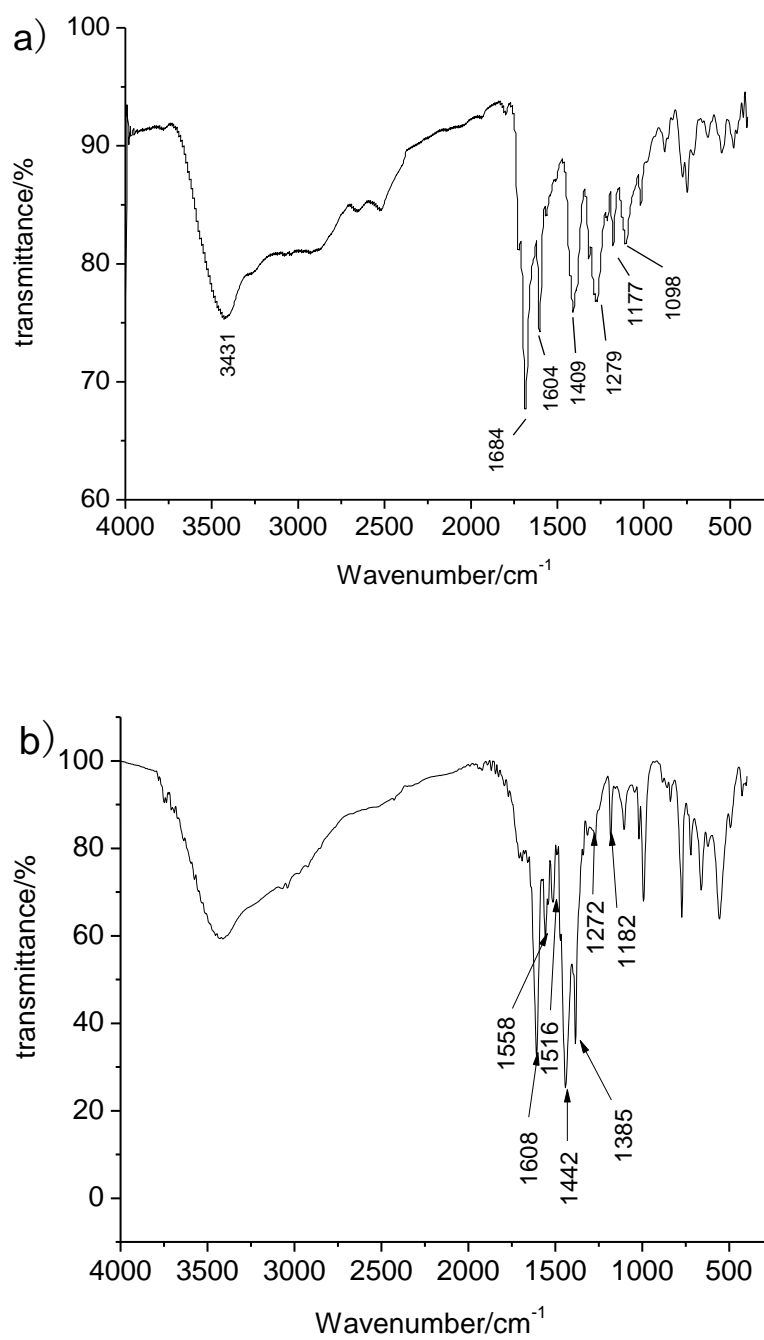

**Fig. S2** FT-IR spectra of a)  $\text{H}_4\text{TCPE}$  and b) Al-TCPE aerogel (KBr pellets).

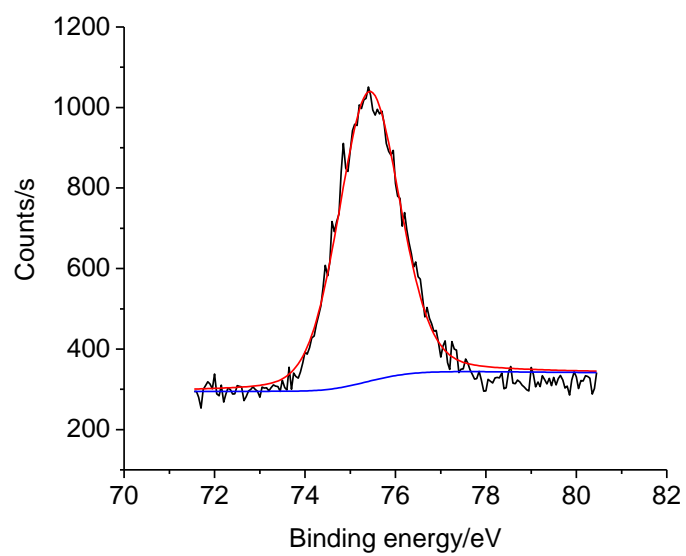

**Fig. S3** XPS Al 2p and deconvoluted spectra of Al-TCPE xerogel.

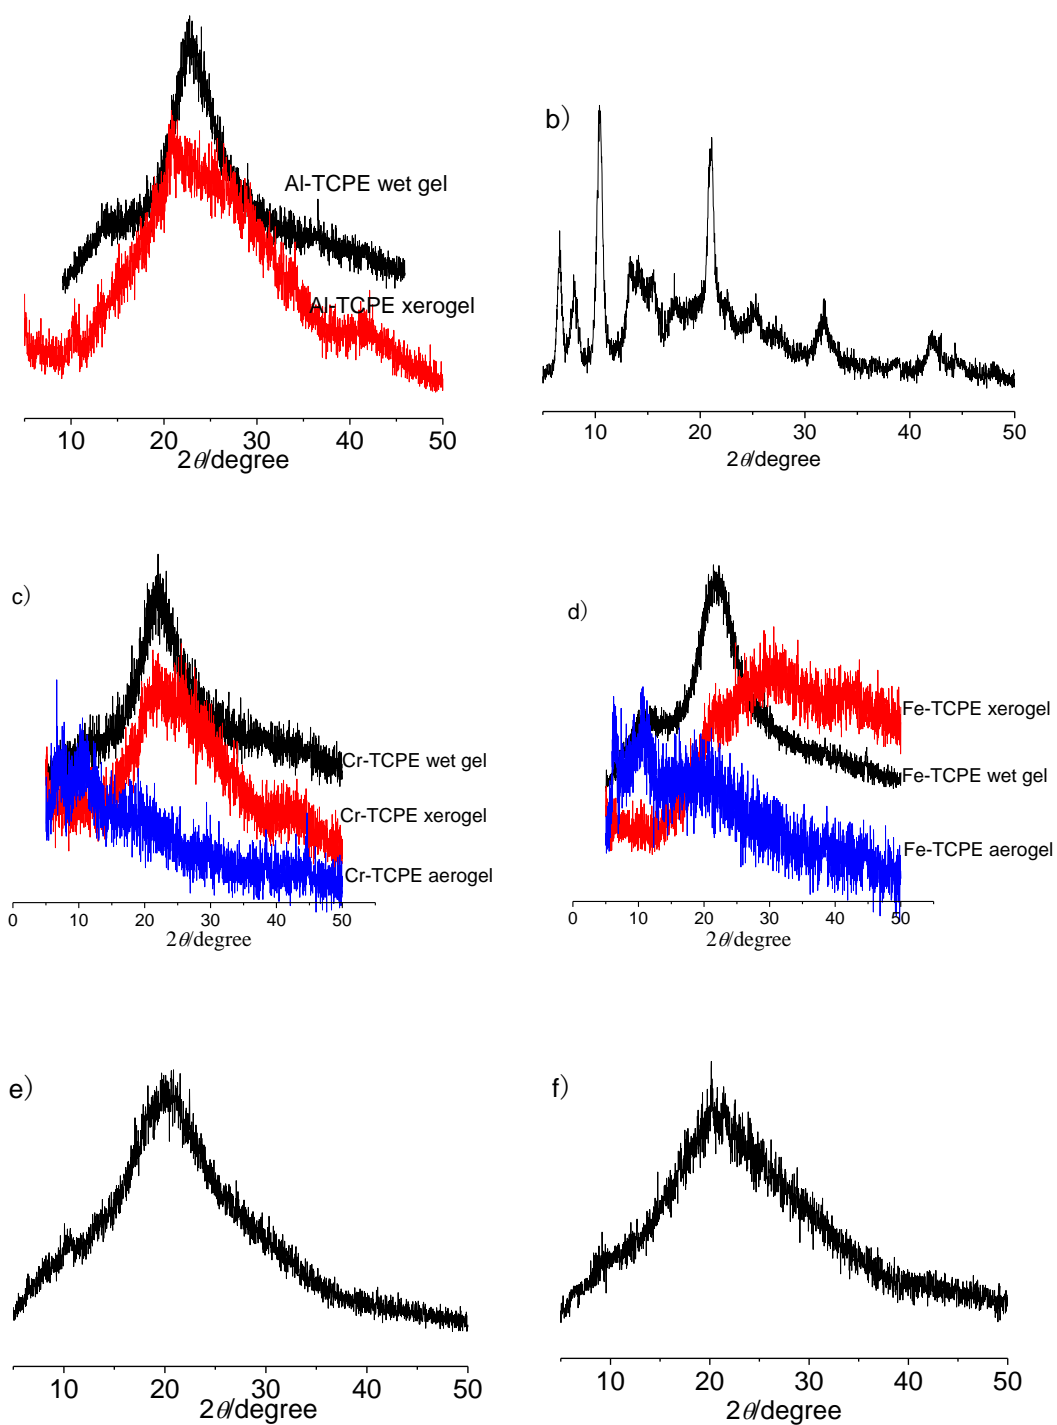

**Fig. S4** Powder X-ray diffraction patterns of a) Al-TCPE wet gel, b) Al-TCPE aerogel, c) Cr-TCPE wet gel, xerogel, and aerogel, d) Fe-TCPE wet gel, xerogel, and aerogel, e) Ga-TCPE wet gel, and f) In-TCPE wet gel.

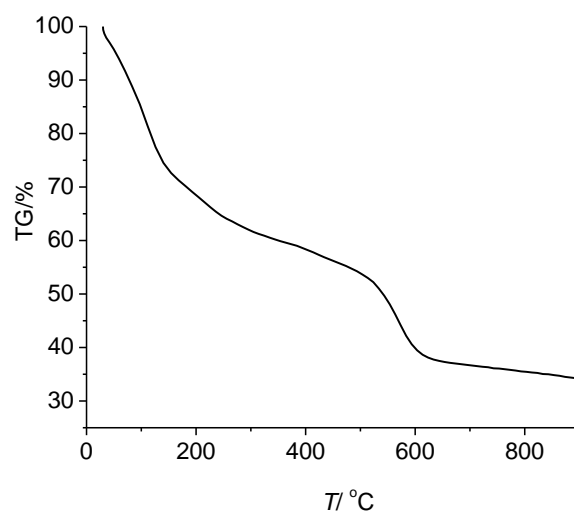

**Fig. S5** TGA curve for Al-TCPE xerogel.

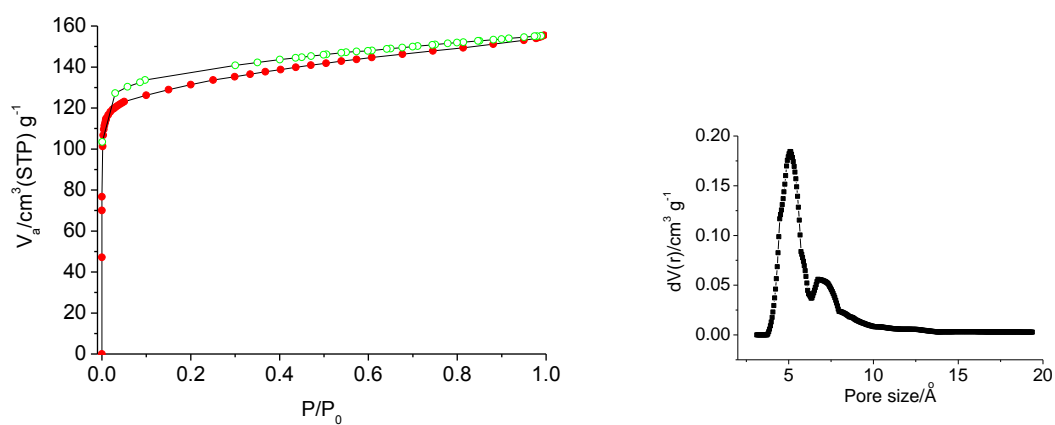

**Fig. S6** N<sub>2</sub> adsorption-desorption isotherms at 77 K and HK micropore distribution of the Fe-TCPE aerogel (0.015 mol L<sup>-1</sup> based on TCPE). BET surface area: 512 m<sup>2</sup> g<sup>-1</sup>; total pore volume: 0.27 cm<sup>3</sup> g<sup>-1</sup>.



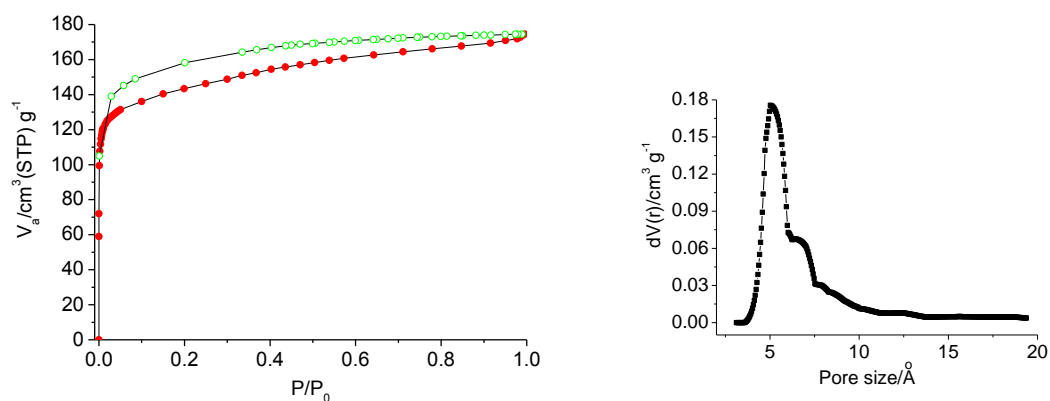

**Fig. S7**  $\text{N}_2$  adsorption-desorption isotherms at 77 K and HK micropore distribution of the Cr-TCPE aerogel ( $0.015\text{ mol L}^{-1}$  based on TCPE). BET surface area:  $546\text{ m}^2\text{ g}^{-1}$ ; total pore volume:  $0.24\text{ cm}^3\text{ g}^{-1}$ .

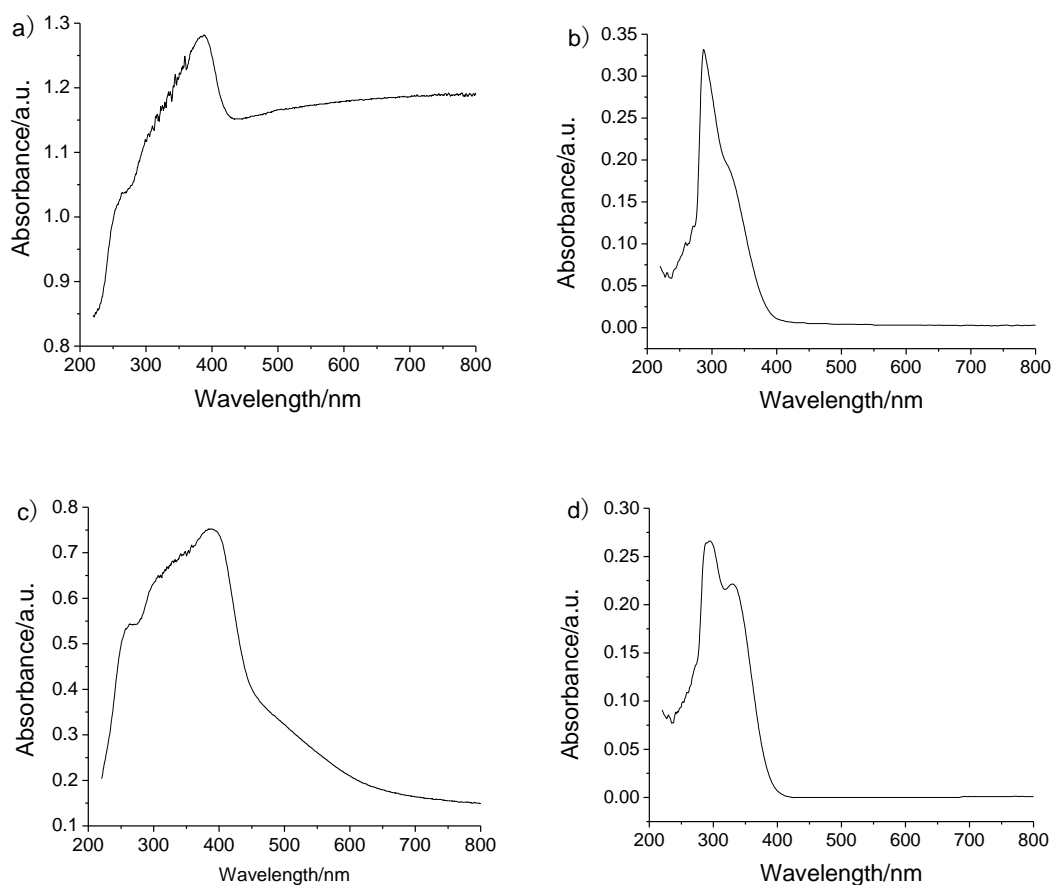

**Fig. S8** UV-vis absorption spectra of a) Al-TCPE gel, b) Al-TCPE gel dispersed in EtOH ( $1.5 \times 10^{-3}\text{ mol L}^{-1}$  based on TCPE), c)  $\text{H}_4\text{TCPE}$  in the solid state, and d)  $\text{H}_4\text{TCPE}$  in EtOH ( $1.5 \times 10^{-3}\text{ mol L}^{-1}$ ).

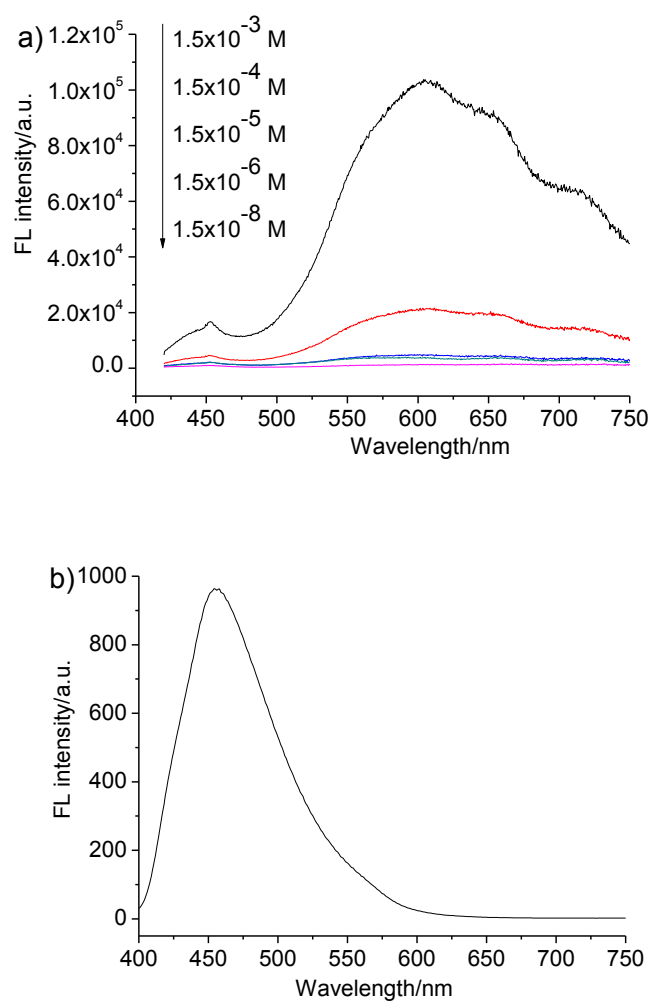

**Fig. S9** Fluorescence spectra of H<sub>4</sub>TCPE a) in EtOH with different concentration ( $\lambda_{\text{ex}} = 403$  nm) showing AIE feature and b) in the solid state ( $\lambda_{\text{ex}} = 385$  nm).

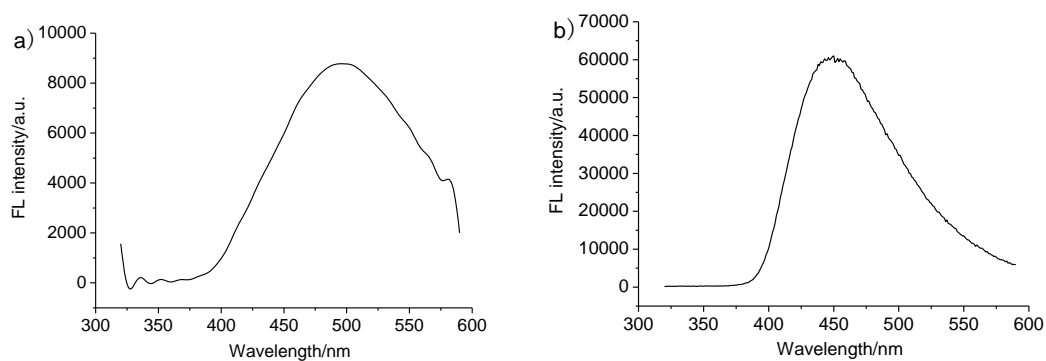

**Fig. S10** Fluorescence spectra of Ga-TCPE ( $\lambda_{\text{ex}} = 300$  nm) and In-TCPE gels ( $\lambda_{\text{ex}} = 298$  nm).

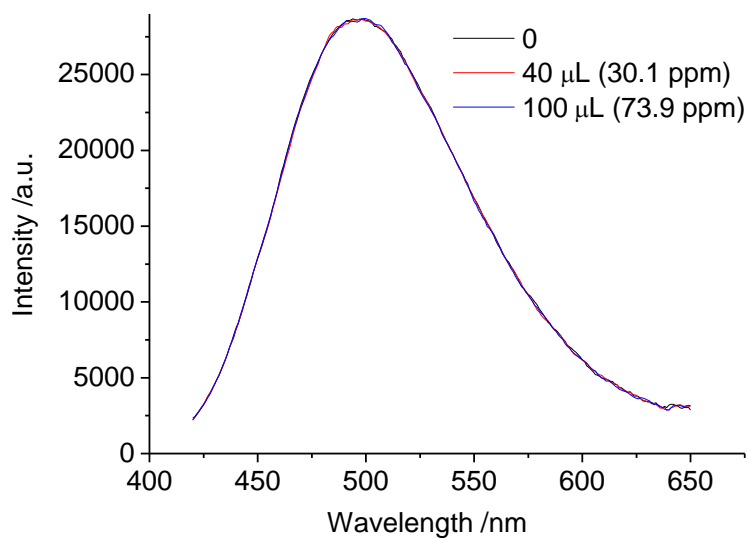

**Fig. S11** Fluorescence titration of Al-TCPE gel was dispersed in EtOH ( $1.5 \times 10^{-3}$  mol/L based on TCPE) with the addition of different volume of benzoic acid solution in EtOH ( $1.0 \times 10^{-2}$  mol/L).

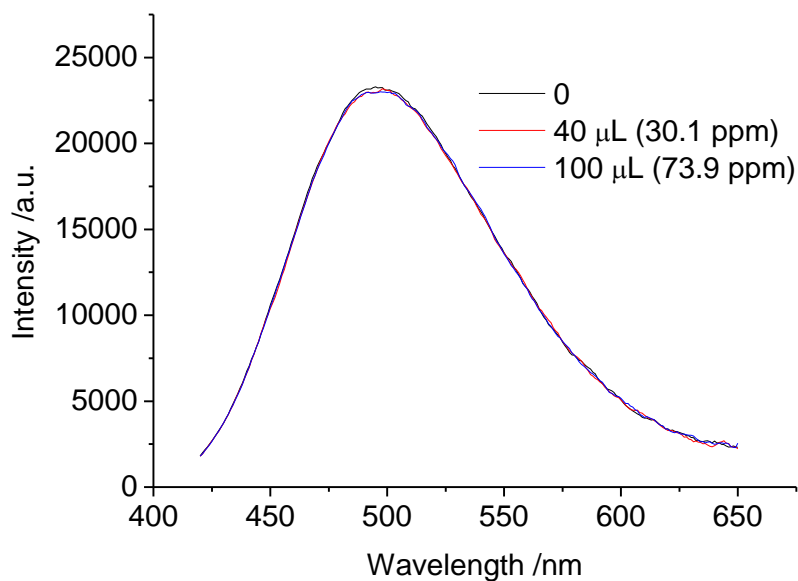

**Fig. S12** Fluorescence titration of Al-TCPE gel was dispersed in EtOH ( $1.5 \times 10^{-3}$  mol/L based on TCPE) with the addition of different volume of nitrobenzene solution in EtOH ( $1.0 \times 10^{-2}$  mol/L).

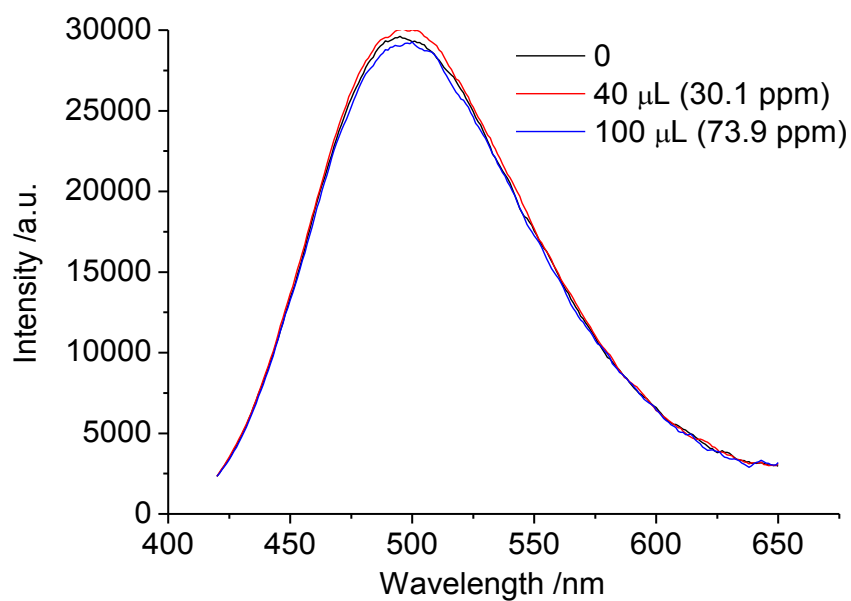

**Fig. S13** Fluorescence titration of Al-TCPE gel was dispersed in EtOH ( $1.5 \times 10^{-3}$  mol/L based on TCPE) with the addition of different volume of 2,4-dinitro-chlorobenzene solution in EtOH ( $1.0 \times 10^{-2}$  mol/L).

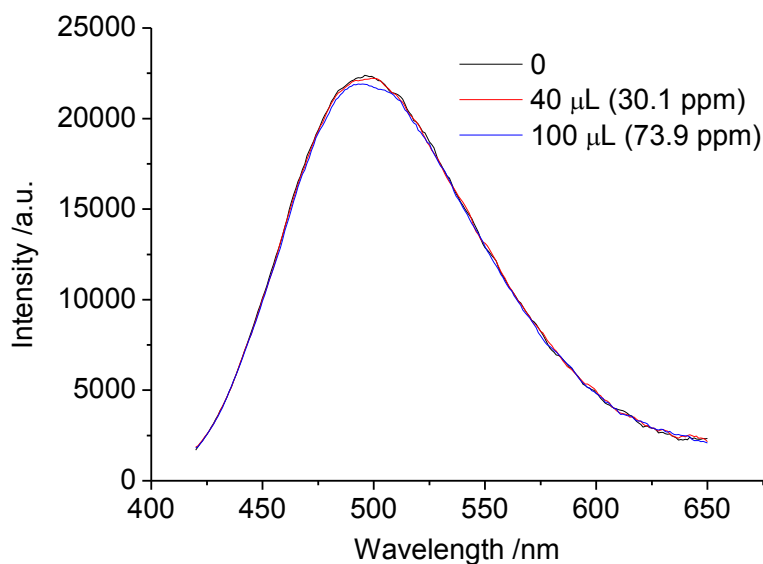

**Fig. S14** Fluorescence titration of Al-TCPE gel was dispersed in EtOH ( $1.5 \times 10^{-3}$  mol/L based on TCPE) with the addition of different volume of chlorobenzene solution in EtOH ( $1.0 \times 10^{-2}$  mol/L).

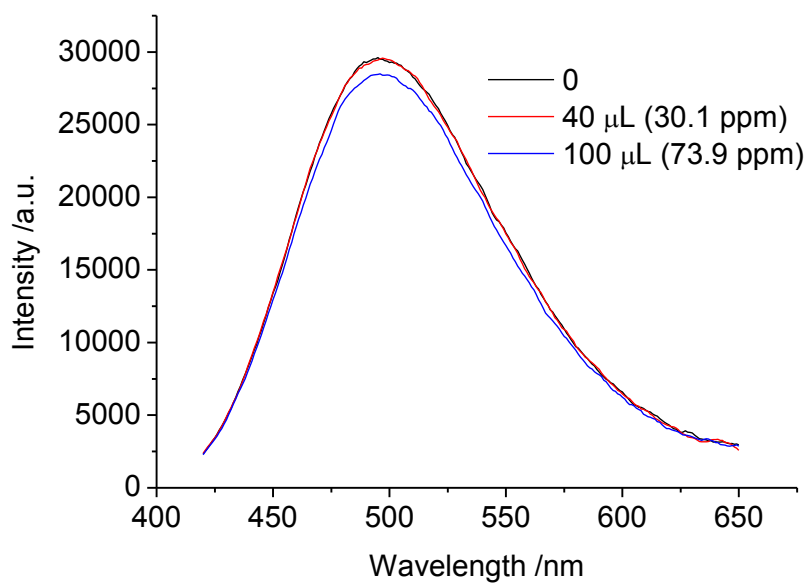

**Fig. S15** Fluorescence titration of Al-TCPE gel was dispersed in EtOH ( $1.5 \times 10^{-3}$  mol/L based on TCPE) with the addition of different volume of 3,5-dinitrobenzoic acid solution in EtOH ( $1.0 \times 10^{-2}$  mol/L).

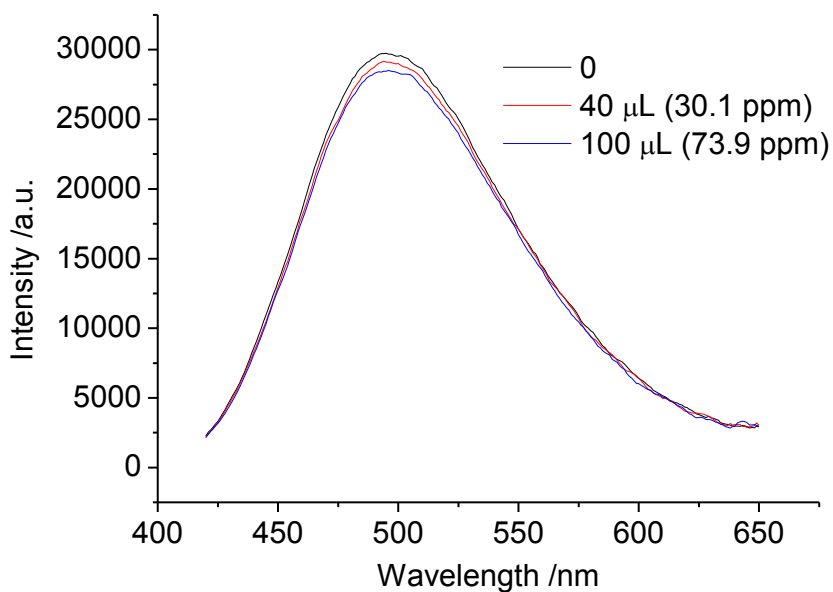

**Fig. S16** Fluorescence titration of Al-TCPE gel was dispersed in EtOH ( $1.5 \times 10^{-3}$  mol/L based on TCPE) with the addition of different volume of 4-nitrotoluene solution in EtOH ( $1.0 \times 10^{-2}$  mol/L).

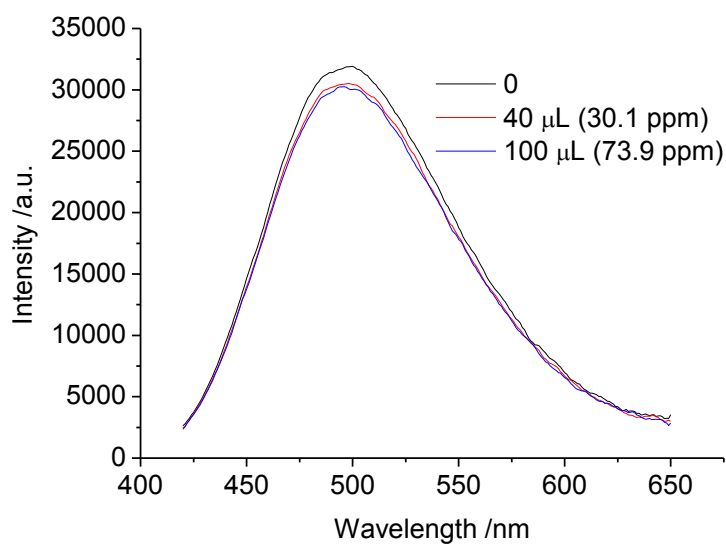

**Fig. S17** Fluorescence titration of Al-TCPE gel was dispersed in EtOH ( $1.5 \times 10^{-3}$  mol/L based on TCPE) with the addition of different volume of bromobenzene solution in EtOH ( $1.0 \times 10^{-2}$  mol/L).

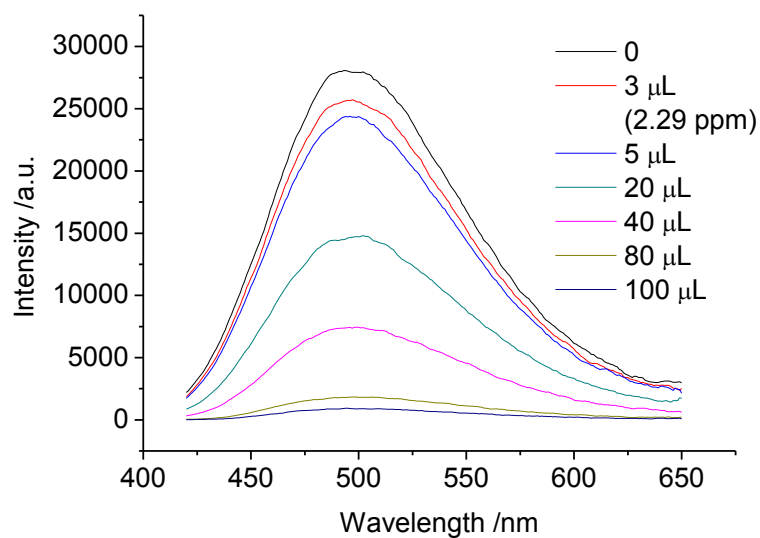

**Fig. S18** Fluorescence titration of Al-TCPE gel was dispersed in EtOH ( $1.5 \times 10^{-3}$  mol/L based on TCPE) with the addition of different volume of PA solution in EtOH ( $1.0 \times 10^{-2}$  mol/L).
